# Supplementary material for: Absence of Either Ripk3 or Mlkl Reduces Incidence of Hepatocellular Carcinoma Independent of Liver Fibrosis
Source: Oxford University Press journal article supplement (doi:10.1158/1541-7786.mcr-22-0820), 2023-05-19
Supplement: mcr-22-0820_supplementary_table_2_suppst2.xlsx [file mcr-22-0820_supplementary_table_2_suppst2.xlsx]

## Sheet: DEG WT CDHFD vs CDHFD KO (both)
SL.No	WT.HFD0_expAvg3	Ripk3ko.HFD0_expAvg3	MLKLko.HFD0_expAvg3	WT.HFD1_expAvg3	Ripk3ko.HFD1_expAvg3	MLKLko.HFD1_expAvg3	gene_id	ENTREZID	sample_1	sample_2	value_1	value_2	lgFold	test_stat	p_value	q_value	SYMBOL	GENENAME	Biotype
1	9.664	10.46	10.499	10.954	9.857	10.793	ENSMUSG00000015656	15481	HFDdf_WT	HFDdf_both	1.29	-0.602	-1.892	-7.99	1.02e-09	8.6e-07	Hspa8	heat shock protein 8	protein_coding;
2	3.678	6.634	6.3	7.088	7.2	7.336	ENSMUSG00000059824	13170	HFDdf_WT	HFDdf_both	3.41	0.566	-2.843	-7.47	5.09e-09	2.8e-06	Dbp	D site albumin promoter binding protein	protein_coding;
3	3.381	4.807	4.066	6.296	5.768	5.506	ENSMUSG00000034647	106585	HFDdf_WT	HFDdf_both	2.915	0.961	-1.954	-6.72	5.35e-08	2.25e-05	Ankrd12	ankyrin repeat domain 12	protein_coding;
4	3.176	3.96	3.986	3.806	3.237	3.11	ENSMUSG00000021018	245841	HFDdf_WT	HFDdf_both	0.63	-0.723	-1.353	-6.59	8.07e-08	2.96e-05	Polr2h	polymerase (RNA) II (DNA directed) polypeptide H	protein_coding;
5	6.241	5.49	6.477	6.651	4.812	6.153	ENSMUSG00000022193	19173	HFDdf_WT	HFDdf_both	0.41	-0.679	-1.089	-6.1	3.82e-07	0.000101	Psmb5	proteasome (prosome, macropain) subunit, beta type 5	protein_coding;
6	4.214	4.759	4.623	5.17	4.784	4.658	ENSMUSG00000024213	56409	HFDdf_WT	HFDdf_both	0.956	0.026	-0.93	-5.94	6.33e-07	0.000101	Nudt3	nudix (nucleotide diphosphate linked moiety X)-type motif 3	protein_coding;
7	5.431	5.821	5.745	6.437	6.091	6.107	ENSMUSG00000029616	67397	HFDdf_WT	HFDdf_both	1.005	0.27	-0.735	-5.67	1.5e-06	0.000177	Erp29	endoplasmic reticulum protein 29	protein_coding;
8	6.183	6.63	6.919	6.472	6.183	6.293	ENSMUSG00000022844	72599	HFDdf_WT	HFDdf_both	0.289	-0.447	-0.736	-5.5	2.57e-06	0.000265	Pdia5	protein disulfide isomerase associated 5	protein_coding;
9	3.736	4.232	4.149	4.7	4.118	4.25	ENSMUSG00000019487	106628	HFDdf_WT	HFDdf_both	0.964	-0.113	-1.077	-5.49	2.66e-06	0.000273	Trip10	thyroid hormone receptor interactor 10	protein_coding;
10	1.319	2.941	3.2	3.378	3.372	3.641	ENSMUSG00000030256	79362	HFDdf_WT	HFDdf_both	2.058	0.432	-1.627	-5.44	3.14e-06	0.00032	Bhlhe41	basic helix-loop-helix family, member e41	protein_coding;
11	2.186	3.142	3.27	4.906	4.098	4.455	ENSMUSG00000062563	12879	HFDdf_WT	HFDdf_both	2.72	0.957	-1.763	-5.39	3.67e-06	0.000367	Cys1	cystin 1	protein_coding;
12	5.659	6.846	6.705	7.374	7.581	7.533	ENSMUSG00000040659	27984	HFDdf_WT	HFDdf_both	1.715	0.736	-0.979	-5.32	4.65e-06	0.000441	Efhd2	EF hand domain containing 2	protein_coding;
13	2.144	2.93	2.72	4.073	3.465	3.258	ENSMUSG00000037499	66208	HFDdf_WT	HFDdf_both	1.929	0.535	-1.394	-5.31	4.69e-06	0.000441	Nenf	neuron derived neurotrophic factor	protein_coding;
14	8.413	8.761	8.839	9.358	9.143	9.233	ENSMUSG00000008682	110954	HFDdf_WT	HFDdf_both	0.945	0.382	-0.564	-5.3	4.84e-06	0.000451	Rpl10	ribosomal protein L10	protein_coding;
15	1.785	2.743	2.487	5.401	4.897	4.802	ENSMUSG00000028843	73723	HFDdf_WT	HFDdf_both	3.616	2.154	-1.461	-5.29	5.14e-06	0.000477	Sh3bgrl3	SH3 domain binding glutamic acid-rich protein-like 3	protein_coding;
16	3.102	3.703	3.683	3.936	3.432	3.246	ENSMUSG00000084319	NA	HFDdf_WT	HFDdf_both	0.834	-0.272	-1.106	-5.24	5.89e-06	0.000537	Tpt1-ps3	tumor protein, translationally-controlled, pseudogene 3	processed_pseudogene;
17	4.623	4.879	4.812	5.008	4.787	4.706	ENSMUSG00000000378	216527	HFDdf_WT	HFDdf_both	0.385	-0.092	-0.477	-5.17	7.49e-06	0.000667	Ccm2	cerebral cavernous malformation 2	protein_coding;
18	3.703	4.325	4.46	4.697	4.282	3.686	ENSMUSG00000014301	66449	HFDdf_WT	HFDdf_both	0.994	-0.774	-1.768	-5.17	7.37e-06	0.0019	Pam16	presequence translocase-asssociated motor 16 homolog (S. cerevisiae)	protein_coding;
19	4.065	4.912	4.924	4.688	4.264	4.361	ENSMUSG00000061207	54402	HFDdf_WT	HFDdf_both	0.623	-0.648	-1.271	-5.06	1.07e-05	0.000882	Stk19	serine/threonine kinase 19	protein_coding;
20	4.322	4.737	4.586	5.925	5.761	5.254	ENSMUSG00000024339	21355	HFDdf_WT	HFDdf_both	1.603	0.667	-0.936	-4.99	1.33e-05	0.00299	Tap2	transporter 2, ATP-binding cassette, sub-family B (MDR/TAP)	protein_coding;
21	2.155	3.27	3.045	6.689	5.961	6.018	ENSMUSG00000027907	20195	HFDdf_WT	HFDdf_both	4.534	2.691	-1.842	-4.98	1.35e-05	0.00108	S100a11	S100 calcium binding protein A11	protein_coding;
22	6.899	7.15	7.346	7.214	6.859	7.007	ENSMUSG00000030007	12468	HFDdf_WT	HFDdf_both	0.315	-0.291	-0.606	-4.97	1.38e-05	0.0011	Cct7	chaperonin containing Tcp1, subunit 7 (eta)	protein_coding;
23	7.137	7.639	7.43	8.435	8.058	7.982	ENSMUSG00000049517	66475	HFDdf_WT	HFDdf_both	1.297	0.419	-0.878	-4.96	1.42e-05	0.00113	Rps23	ribosomal protein S23	protein_coding;
24	6.829	7.57	7.756	8.015	7.995	8.201	ENSMUSG00000023150	117198	HFDdf_WT	HFDdf_both	1.186	0.425	-0.761	-4.96	1.46e-05	0.00115	Ivns1abp	influenza virus NS1A binding protein	protein_coding;
25	6.782	7.367	7.464	7.236	6.905	6.893	ENSMUSG00000073676	15528	HFDdf_WT	HFDdf_both	0.453	-0.462	-0.916	-4.93	1.58e-05	0.00122	Hspe1	heat shock protein 1 (chaperonin 10)	protein_coding;
26	8.555	9.085	9	9.773	9.391	9.389	ENSMUSG00000032518	16785	HFDdf_WT	HFDdf_both	1.218	0.306	-0.912	-4.9	1.72e-05	0.00129	Rpsa	ribosomal protein SA	protein_coding;
27	7.825	8.315	8.171	9.055	8.765	8.667	ENSMUSG00000045128	76808	HFDdf_WT	HFDdf_both	1.229	0.45	-0.78	-4.85	2.01e-05	0.00144	Rpl18a	ribosomal protein L18A	protein_coding;
28	5.622	6.037	6.085	6.521	6.079	6.072	ENSMUSG00000053317	66212	HFDdf_WT	HFDdf_both	0.899	0.042	-0.858	-4.83	2.17e-05	0.00153	Sec61b	Sec61 beta subunit	protein_coding;
29	5.011	5.43	5.319	5.908	5.455	5.374	ENSMUSG00000074884	378702	HFDdf_WT	HFDdf_both	0.896	0.025	-0.871	-4.82	2.21e-05	0.00155	Serf2	small EDRK-rich factor 2	protein_coding;
30	7.73	8.049	7.895	9.121	8.935	8.771	ENSMUSG00000016256	64138	HFDdf_WT	HFDdf_both	1.391	0.886	-0.505	-4.82	2.21e-05	0.00155	Ctsz	cathepsin Z	protein_coding;
31	0.527	1.926	1.547	5.35	4.908	4.439	ENSMUSG00000079017	76933	HFDdf_WT	HFDdf_both	4.823	2.982	-1.841	-4.81	2.29e-05	0.0016	Ifi27l2a	interferon, alpha-inducible protein 27 like 2A	protein_coding;
32	5.021	5.405	5.236	5.643	5.339	5.237	ENSMUSG00000002768	17256	HFDdf_WT	HFDdf_both	0.622	-0.066	-0.688	-4.8	2.38e-05	0.00165	Mea1	male enhanced antigen 1	protein_coding;
33	7.44	7.759	7.67	8.161	7.864	7.769	ENSMUSG00000061315	17938	HFDdf_WT	HFDdf_both	0.721	0.105	-0.616	-4.73	2.96e-05	0.00191	Naca	nascent polypeptide-associated complex alpha polypeptide	protein_coding;
34	1.843	2.673	2.516	2.437	1.907	1.499	ENSMUSG00000035595	69770	HFDdf_WT	HFDdf_both	0.594	-0.766	-1.36	-4.73	2.98e-05	0.00192	Fam174c	family with sequence similarity 174, member C	protein_coding;
35	0.606	1.438	1.928	3.892	3.508	3.412	ENSMUSG00000068245	219132	HFDdf_WT	HFDdf_both	3.286	1.483	-1.803	-4.71	3.14e-05	0.00516	Phf11d	PHD finger protein 11D	protein_coding;
36	3.24	3.985	3.782	5.428	5.37	4.712	ENSMUSG00000040253	229900	HFDdf_WT	HFDdf_both	2.187	0.929	-1.258	-4.71	3.19e-05	0.00517	Gbp7	guanylate binding protein 7	protein_coding;
37	3.476	3.959	3.931	4.574	4.151	4.211	ENSMUSG00000079003	666704	HFDdf_WT	HFDdf_both	1.098	0.192	-0.906	-4.69	3.32e-05	0.00209	Samd1	sterile alpha motif domain containing 1	protein_coding;
38	7.322	7.985	7.833	9.269	8.744	8.659	ENSMUSG00000061983	20042	HFDdf_WT	HFDdf_both	1.947	0.759	-1.188	-4.69	3.38e-05	0.00211	Rps12	ribosomal protein S12	protein_coding;
39	7.285	7.564	7.613	8.084	7.931	7.676	ENSMUSG00000022564	66168	HFDdf_WT	HFDdf_both	0.799	0.063	-0.736	-4.68	3.44e-05	0.0054	Grina	glutamate receptor, ionotropic, N-methyl D-aspartate-associated protein 1 (glutamate binding)	protein_coding;
40	7.987	8.41	8.604	9.279	8.994	8.766	ENSMUSG00000025492	66141	HFDdf_WT	HFDdf_both	1.291	0.163	-1.129	-4.66	3.71e-05	0.00569	Ifitm3	interferon induced transmembrane protein 3	protein_coding;
41	3.936	4.736	4.558	4.936	4.657	4.423	ENSMUSG00000042462	66422	HFDdf_WT	HFDdf_both	1	-0.079	-1.079	-4.65	3.76e-05	0.00228	Dctpp1	dCTP pyrophosphatase 1	protein_coding;
42	0.581	1.871	1.191	4.676	4.45	3.854	ENSMUSG00000025887	12364	HFDdf_WT	HFDdf_both	4.095	2.578	-1.517	-4.65	3.83e-05	0.00231	Casp12	caspase 12	protein_coding;
43	4.737	5.154	5.145	5.557	5.138	4.852	ENSMUSG00000059518	70103	HFDdf_WT	HFDdf_both	0.819	-0.016	-0.835	-4.63	4.01e-05	0.00239	Znhit1	zinc finger, HIT domain containing 1	protein_coding;
44	4.691	5.183	5.706	5.785	5.544	5.446	ENSMUSG00000023764	78887	HFDdf_WT	HFDdf_both	1.094	-0.26	-1.354	-4.59	4.56e-05	0.00647	Sfi1	Sfi1 homolog, spindle assembly associated (yeast)	protein_coding;
45	4.035	5.189	6.086	5.041	5.214	5.559	ENSMUSG00000003134	54610	HFDdf_WT	HFDdf_both	1.006	-0.528	-1.533	-4.56	5.02e-05	0.00691	Tbc1d8	TBC1 domain family, member 8	protein_coding;
46	5.767	6.084	5.999	6.807	6.493	6.32	ENSMUSG00000029465	56378	HFDdf_WT	HFDdf_both	1.04	0.409	-0.631	-4.55	5.17e-05	0.00288	Arpc3	actin related protein 2/3 complex, subunit 3	protein_coding;
47	6.286	6.938	6.784	7.744	7.413	7.238	ENSMUSG00000090733	57294	HFDdf_WT	HFDdf_both	1.458	0.475	-0.984	-4.55	5.25e-05	0.00291	Rps27	ribosomal protein S27	protein_coding;
48	3.578	4.189	4.125	4.284	3.747	3.616	ENSMUSG00000002580	103742	HFDdf_WT	HFDdf_both	0.706	-0.442	-1.148	-4.52	5.65e-05	0.00307	Mien1	migration and invasion enhancer 1	protein_coding;
49	5.084	5.572	5.461	6.374	6.05	5.783	ENSMUSG00000031897	19171	HFDdf_WT	HFDdf_both	1.29	0.478	-0.812	-4.52	5.73e-05	0.0031	Psmb10	proteasome (prosome, macropain) subunit, beta type 10	protein_coding;
50	6.714	7.171	7.11	7.886	7.333	7.134	ENSMUSG00000063316	19942	HFDdf_WT	HFDdf_both	1.172	0.162	-1.01	-4.5	5.95e-05	0.00318	Rpl27	ribosomal protein L27	protein_coding;
51	4.374	4.881	4.804	6.028	5.614	5.411	ENSMUSG00000038387	20130	HFDdf_WT	HFDdf_both	1.654	0.733	-0.921	-4.5	5.95e-05	0.00318	Rras	related RAS viral (r-ras) oncogene	protein_coding;
52	0.725	1.561	1.698	2.083	0.946	0.738	ENSMUSG00000024871	60425	HFDdf_WT	HFDdf_both	1.358	-0.615	-1.973	-4.5	6e-05	0.00319	Doc2g	double C2, gamma	protein_coding;
53	7.975	8.54	8.385	9.525	9.026	8.9	ENSMUSG00000008668	20084	HFDdf_WT	HFDdf_both	1.55	0.486	-1.064	-4.49	6.29e-05	0.00329	Rps18	ribosomal protein S18	protein_coding;
54	7.207	7.614	7.526	8.179	7.542	7.453	ENSMUSG00000015092	59022	HFDdf_WT	HFDdf_both	0.972	-0.071	-1.043	-4.48	6.35e-05	0.00331	Edf1	endothelial differentiation-related factor 1	protein_coding;
55	5.145	5.542	5.467	5.894	5.564	5.337	ENSMUSG00000022400	56438	HFDdf_WT	HFDdf_both	0.749	0.021	-0.728	-4.45	7.12e-05	0.00362	Rbx1	ring-box 1	protein_coding;
56	2.662	3.261	2.964	3.188	2.922	2.561	ENSMUSG00000024944	56327	HFDdf_WT	HFDdf_both	0.526	-0.339	-0.865	-4.45	7.14e-05	0.00363	Arl2	ADP-ribosylation factor-like 2	protein_coding;
57	4.567	4.994	4.978	5.43	5.17	5.048	ENSMUSG00000003269	19158	HFDdf_WT	HFDdf_both	0.863	0.176	-0.687	-4.43	7.52e-05	0.00377	Cyth2	cytohesin 2	protein_coding;
58	4.833	5.396	5.141	5.348	5.133	4.866	ENSMUSG00000029066	66448	HFDdf_WT	HFDdf_both	0.515	-0.263	-0.778	-4.42	7.65e-05	0.0038	Mrpl20	mitochondrial ribosomal protein L20	protein_coding;
59	4.102	4.598	4.557	4.64	4.041	3.892	ENSMUSG00000042737	68563	HFDdf_WT	HFDdf_both	0.539	-0.556	-1.095	-4.41	8.08e-05	0.00397	Dpm3	dolichyl-phosphate mannosyltransferase polypeptide 3	protein_coding;
60	7.761	8.106	8.02	8.868	8.59	8.497	ENSMUSG00000071415	65019	HFDdf_WT	HFDdf_both	1.106	0.483	-0.623	-4.39	8.38e-05	0.00404	Rpl23	ribosomal protein L23	protein_coding;
61	5.627	6.063	5.904	6.404	6.204	6.027	ENSMUSG00000019054	66437	HFDdf_WT	HFDdf_both	0.777	0.14	-0.636	-4.38	8.81e-05	0.00418	Fis1	fission, mitochondrial 1	protein_coding;
62	4.555	4.95	4.942	5.596	5.069	4.838	ENSMUSG00000006095	66411	HFDdf_WT	HFDdf_both	1.041	0.119	-0.922	-4.37	8.97e-05	0.00422	Tbcb	tubulin folding cofactor B	protein_coding;
63	4.559	4.959	5.023	5.344	5.368	5.137	ENSMUSG00000024847	11632	HFDdf_WT	HFDdf_both	0.785	0.113	-0.671	-4.36	9.23e-05	0.0101	Aip	aryl-hydrocarbon receptor-interacting protein	protein_coding;
64	0.816	4.629	5.038	4.241	5.223	4.981	ENSMUSG00000038550	229599	HFDdf_WT	HFDdf_both	3.425	0.594	-2.831	-4.35	9.51e-05	0.0044	Ciart	circadian associated repressor of transcription	protein_coding;
65	4.93	5.289	5.356	5.388	4.996	4.828	ENSMUSG00000038722	231889	HFDdf_WT	HFDdf_both	0.458	-0.293	-0.751	-4.35	9.54e-05	0.0044	Bud31	BUD31 homolog	protein_coding;
66	6.499	6.911	6.782	7.668	7.408	7.273	ENSMUSG00000074227	20733	HFDdf_WT	HFDdf_both	1.17	0.498	-0.672	-4.35	9.56e-05	0.0044	Spint2	serine protease inhibitor, Kunitz type 2	protein_coding;
67	7.417	7.848	7.835	8.584	8.136	8.111	ENSMUSG00000025794	67115	HFDdf_WT	HFDdf_both	1.167	0.287	-0.879	-4.32	0.000103	0.00464	Rpl14	ribosomal protein L14	protein_coding;
68	5.283	5.691	5.645	6.262	6.019	5.865	ENSMUSG00000115987	66914	HFDdf_WT	HFDdf_both	0.979	0.328	-0.651	-4.32	0.000104	0.00464	Vps28	vacuolar protein sorting 28	protein_coding;
69	5.928	6.315	6.461	6.594	6.266	6.06	ENSMUSG00000006050	24068	HFDdf_WT	HFDdf_both	0.666	-0.401	-1.066	-4.31	0.000108	0.0111	Sra1	steroid receptor RNA activator 1	protein_coding;
70	7.431	7.938	7.907	8.806	8.345	8.277	ENSMUSG00000060938	19941	HFDdf_WT	HFDdf_both	1.375	0.406	-0.969	-4.3	0.000111	0.00489	Rpl26	ribosomal protein L26	protein_coding;
71	2.816	4.912	4.726	5.413	5.866	5.717	ENSMUSG00000028957	18628	HFDdf_WT	HFDdf_both	2.597	0.954	-1.643	-4.3	0.000111	0.00489	Per3	period circadian clock 3	protein_coding;
72	4.621	5.118	4.932	5.327	4.98	4.546	ENSMUSG00000107002	NA	HFDdf_WT	HFDdf_both	0.706	-0.137	-0.843	-4.29	0.000114	0.00498	0610012G03Rik	RIKEN cDNA 0610012G03 gene	protein_coding;
73	5.566	5.932	5.812	6.334	6.025	5.836	ENSMUSG00000010376	18002	HFDdf_WT	HFDdf_both	0.768	0.093	-0.674	-4.29	0.000116	0.00505	Nedd8	neural precursor cell expressed, developmentally down-regulated gene 8	protein_coding;
74	5.503	5.963	5.895	6.8	6.583	6.245	ENSMUSG00000027078	56791	HFDdf_WT	HFDdf_both	1.297	0.62	-0.677	-4.28	0.000117	0.00507	Ube2l6	ubiquitin-conjugating enzyme E2L 6	protein_coding;
75	6.079	6.59	6.577	7.191	7.002	7.002	ENSMUSG00000008683	267019	HFDdf_WT	HFDdf_both	1.112	0.412	-0.7	-4.28	0.000119	0.00507	Rps15a	ribosomal protein S15A	protein_coding;
76	7.376	7.859	7.848	8.955	8.516	8.44	ENSMUSG00000038900	269261	HFDdf_WT	HFDdf_both	1.579	0.657	-0.922	-4.27	0.000124	0.0052	Rpl12	ribosomal protein L12	protein_coding;
77	7.583	8.066	7.971	8.855	8.448	8.303	ENSMUSG00000063457	20054	HFDdf_WT	HFDdf_both	1.272	0.382	-0.89	-4.26	0.000125	0.00522	Rps15	ribosomal protein S15	protein_coding;
78	7.133	7.587	7.513	8.356	7.961	7.778	ENSMUSG00000046330	19981	HFDdf_WT	HFDdf_both	1.224	0.374	-0.85	-4.26	0.000125	0.00522	Rpl37a	ribosomal protein L37a	protein_coding;
79	2.379	2.952	2.821	3.025	2.392	2.059	ENSMUSG00000081094	NA	HFDdf_WT	HFDdf_both	0.646	-0.56	-1.206	-4.23	0.00014	0.00565	Rpl19-ps11	ribosomal protein L19, pseudogene 11	processed_pseudogene;
80	2.022	3.093	3.209	5.778	4.92	4.39	ENSMUSG00000035692	100038882	HFDdf_WT	HFDdf_both	3.756	1.827	-1.929	-4.21	0.000147	0.00583	Isg15	ISG15 ubiquitin-like modifier	protein_coding;
81	7.113	7.457	7.36	8.462	8.124	8.014	ENSMUSG00000090841	17904	HFDdf_WT	HFDdf_both	1.349	0.667	-0.681	-4.18	0.000163	0.00623	Myl6	myosin, light polypeptide 6, alkali, smooth muscle and non-muscle	protein_coding;
82	4.247	4.626	4.662	5.33	5.052	4.649	ENSMUSG00000037772	19935	HFDdf_WT	HFDdf_both	1.084	-0.013	-1.097	-4.18	0.000159	0.0138	Mrpl23	mitochondrial ribosomal protein L23	protein_coding;
83	3.533	4.08	4.076	4.407	3.997	3.493	ENSMUSG00000106918	66845	HFDdf_WT	HFDdf_both	0.874	-0.082	-0.956	-4.16	0.000168	0.00638	Mrpl33	mitochondrial ribosomal protein L33	protein_coding;
84	4.838	5.34	5.34	5.318	4.993	4.934	ENSMUSG00000038489	66491	HFDdf_WT	HFDdf_both	0.479	-0.347	-0.826	-4.16	0.00017	0.00641	Polr2l	polymerase (RNA) II (DNA directed) polypeptide L	protein_coding;
85	3.11	3.678	3.849	4.618	3.849	3.371	ENSMUSG00000030587	72275	HFDdf_WT	HFDdf_both	1.507	0.171	-1.337	-4.15	0.000174	0.00651	2200002D01Rik	RIKEN cDNA 2200002D01 gene	protein_coding;
86	2.161	2.884	2.993	4.678	4.033	3.903	ENSMUSG00000001918	20514	HFDdf_WT	HFDdf_both	2.517	1.149	-1.369	-4.15	0.000175	0.00652	Slc1a5	solute carrier family 1 (neutral amino acid transporter), member 5	protein_coding;
87	6.333	6.704	6.673	7.507	7.125	6.723	ENSMUSG00000022216	19186	HFDdf_WT	HFDdf_both	1.174	0.05	-1.124	-4.15	0.000175	0.0144	Psme1	proteasome (prosome, macropain) activator subunit 1 (PA28 alpha)	protein_coding;
88	5.274	5.664	5.599	5.717	5.415	5.218	ENSMUSG00000020022	66414	HFDdf_WT	HFDdf_both	0.443	-0.249	-0.692	-4.13	0.000189	0.00688	Ndufa12	NADH:ubiquinone oxidoreductase subunit A12	protein_coding;
89	2.526	2.982	3.108	3.034	2.683	2.266	ENSMUSG00000098234	NA	HFDdf_WT	HFDdf_both	0.507	-0.843	-1.35	-4.12	0.00019	0.0151	Snhg6	small nucleolar RNA host gene 6	lncRNA;
90	5.99	6.294	6.241	6.685	6.374	6.257	ENSMUSG00000058546	268449	HFDdf_WT	HFDdf_both	0.695	0.081	-0.614	-4.1	0.000205	0.00727	Rpl23a	ribosomal protein L23A	protein_coding;
91	4.962	5.438	5.238	5.818	5.506	5.221	ENSMUSG00000024414	94064	HFDdf_WT	HFDdf_both	0.856	0.068	-0.787	-4.09	0.000208	0.00733	Mrpl27	mitochondrial ribosomal protein L27	protein_coding;
92	5.144	5.564	5.48	5.58	5.372	5.263	ENSMUSG00000023106	68184	HFDdf_WT	HFDdf_both	0.436	-0.192	-0.628	-4.09	0.000208	0.00734	Denr	density-regulated protein	protein_coding;
93	4.927	5.267	5.284	5.381	4.954	4.907	ENSMUSG00000079658	67923	HFDdf_WT	HFDdf_both	0.454	-0.312	-0.767	-4.09	0.000212	0.00743	Eloc	elongin C	protein_coding;
94	5.495	6.091	5.851	6.937	6.641	6.216	ENSMUSG00000001289	56612	HFDdf_WT	HFDdf_both	1.442	0.551	-0.891	-4.09	0.000213	0.00746	Pfdn5	prefoldin 5	protein_coding;
95	6.267	6.566	6.536	6.636	6.502	6.383	ENSMUSG00000044627	72931	HFDdf_WT	HFDdf_both	0.369	-0.065	-0.434	-4.08	0.000214	0.00749	Swi5	SWI5 recombination repair homolog (yeast)	protein_coding;
96	4.104	4.626	4.596	5.633	5.084	4.95	ENSMUSG00000034932	66047	HFDdf_WT	HFDdf_both	1.529	0.458	-1.07	-4.08	0.000216	0.00751	Mrpl54	mitochondrial ribosomal protein L54	protein_coding;
97	4.574	4.843	4.819	5.053	4.737	4.611	ENSMUSG00000030706	52443	HFDdf_WT	HFDdf_both	0.479	-0.106	-0.585	-4.08	0.000216	0.00752	Mrpl48	mitochondrial ribosomal protein L48	protein_coding;
98	6.164	6.616	6.564	7.081	6.847	6.726	ENSMUSG00000058600	19946	HFDdf_WT	HFDdf_both	0.917	0.231	-0.686	-4.07	0.000221	0.00765	Rpl30	ribosomal protein L30	protein_coding;
99	4.536	5.36	5.493	5.296	5.434	5.19	ENSMUSG00000029833	21848	HFDdf_WT	HFDdf_both	0.76	-0.303	-1.063	-4.06	0.000228	0.0165	Trim24	tripartite motif-containing 24	protein_coding;
100	4.324	4.862	4.964	5.642	5.232	4.963	ENSMUSG00000010358	70110	HFDdf_WT	HFDdf_both	1.318	0.37	-0.948	-4.04	0.000248	0.00826	Ifi35	interferon-induced protein 35	protein_coding;
101	5.901	6.403	6.442	7.413	6.972	6.525	ENSMUSG00000018585	11927	HFDdf_WT	HFDdf_both	1.513	0.083	-1.43	-4.04	0.000245	0.0172	Atox1	antioxidant 1 copper chaperone	protein_coding;
102	6.691	7.191	7.137	7.938	7.458	7.139	ENSMUSG00000060636	57808	HFDdf_WT	HFDdf_both	1.246	0.267	-0.979	-4.03	0.000249	0.00827	Rpl35a	ribosomal protein L35A	protein_coding;
103	7.227	7.991	8.325	7.615	7.781	7.952	ENSMUSG00000022353	211401	HFDdf_WT	HFDdf_both	0.388	-0.21	-0.598	-4.03	0.000252	0.00831	Mtss1	metastasis suppressor 1	protein_coding;
104	1.178	2.13	1.684	5.453	5.254	4.763	ENSMUSG00000000682	23833	HFDdf_WT	HFDdf_both	4.274	3.124	-1.151	-4.03	0.000253	0.00831	Cd52	CD52 antigen	protein_coding;
105	6.833	7.315	7.287	8.225	7.899	7.698	ENSMUSG00000028234	67427	HFDdf_WT	HFDdf_both	1.392	0.584	-0.808	-4.02	0.000257	0.00842	Rps20	ribosomal protein S20	protein_coding;
106	4.141	4.866	4.593	5.81	5.498	5.015	ENSMUSG00000046229	19018	HFDdf_WT	HFDdf_both	1.669	0.632	-1.036	-4.01	0.000265	0.0086	Scand1	SCAN domain-containing 1	protein_coding;
107	-0.596	0.472	0.242	1.914	1.391	0.613	ENSMUSG00000057286	20446	HFDdf_WT	HFDdf_both	2.51	0.919	-1.591	-4	0.000272	0.0087	St6galnac2	ST6 (alpha-N-acetyl-neuraminyl-2,3-beta-galactosyl-1,3)-N-acetylgalactosaminide alpha-2,6-sialyltransferase 2	protein_coding;
108	7.542	7.922	7.879	8.52	8.209	8.024	ENSMUSG00000046364	26451	HFDdf_WT	HFDdf_both	0.978	0.287	-0.691	-4	0.000278	0.0088	Rpl27a	ribosomal protein L27A	protein_coding;
109	4.678	5.083	5.054	5.706	5.332	5.134	ENSMUSG00000024844	23825	HFDdf_WT	HFDdf_both	1.027	0.249	-0.778	-4	0.000278	0.0088	Banf1	barrier to autointegration factor 1	protein_coding;
110	6.843	7.393	7.29	8.2	7.652	7.436	ENSMUSG00000057863	54217	HFDdf_WT	HFDdf_both	1.357	0.259	-1.098	-3.99	0.000287	0.00902	Rpl36	ribosomal protein L36	protein_coding;
111	5.64	5.981	5.944	6.313	5.986	5.824	ENSMUSG00000030538	23991	HFDdf_WT	HFDdf_both	0.672	0.005	-0.667	-3.98	0.000296	0.00921	Cib1	calcium and integrin binding 1 (calmyrin)	protein_coding;
112	7.393	8.004	7.977	8.133	7.856	7.513	ENSMUSG00000072115	11727	HFDdf_WT	HFDdf_both	0.74	-0.148	-0.887	-3.94	0.000327	0.00987	Ang	angiogenin, ribonuclease, RNase A family, 5	protein_coding;
113	4.301	4.706	4.625	5.05	4.719	4.533	ENSMUSG00000078348	66125	HFDdf_WT	HFDdf_both	0.749	0.013	-0.736	-3.94	0.000331	0.00993	Sf3b5	splicing factor 3b, subunit 5	protein_coding;
114	0.316	0.842	0.754	1.674	1.014	0.691	ENSMUSG00000021773	69156	HFDdf_WT	HFDdf_both	1.358	0.171	-1.187	-3.94	0.000333	0.00997	Comtd1	catechol-O-methyltransferase domain containing 1	protein_coding;
115	4.37	4.888	4.863	5.17	5.054	4.694	ENSMUSG00000020485	20922	HFDdf_WT	HFDdf_both	0.8	-0.169	-0.969	-3.94	0.000334	0.0202	Supt4a	suppressor of Ty 4A	protein_coding;
116	2.437	3.23	3.299	4.468	4.397	4.182	ENSMUSG00000025586	12877	HFDdf_WT	HFDdf_both	2.031	1.167	-0.864	-3.93	0.000338	0.00998	Cpeb1	cytoplasmic polyadenylation element binding protein 1	protein_coding;
117	5.833	6.292	6.121	7.078	6.992	6.712	ENSMUSG00000041736	12257	HFDdf_WT	HFDdf_both	1.245	0.7	-0.545	-3.93	0.000342	0.0101	Tspo	translocator protein	protein_coding;
118	5.799	6.277	6.235	6.85	6.301	6.06	ENSMUSG00000055839	67673	HFDdf_WT	HFDdf_both	1.05	0.024	-1.027	-3.92	0.000348	0.0102	Elob	elongin B	protein_coding;
119	3.051	3.575	3.726	3.818	3.391	3.292	ENSMUSG00000108414	NA	HFDdf_WT	HFDdf_both	0.767	-0.184	-0.951	-3.91	0.000363	0.0105	Snhg1	small nucleolar RNA host gene 1	lncRNA;
120	4.095	4.607	4.497	5.1	4.725	4.51	ENSMUSG00000040269	66230	HFDdf_WT	HFDdf_both	1.005	0.118	-0.887	-3.9	0.000369	0.0106	Mrps28	mitochondrial ribosomal protein S28	protein_coding;
121	4.843	5.259	5.401	5.579	5.203	5	ENSMUSG00000036835	66340	HFDdf_WT	HFDdf_both	0.736	-0.056	-0.792	-3.9	0.000371	0.0106	Psenen	presenilin enhancer gamma secretase subunit	protein_coding;
122	5.24	5.636	5.611	5.624	5.482	5.37	ENSMUSG00000029642	20018	HFDdf_WT	HFDdf_both	0.384	-0.154	-0.538	-3.9	0.000374	0.0107	Polr1d	polymerase (RNA) I polypeptide D	protein_coding;
123	4.447	5.001	4.966	5.419	4.929	4.68	ENSMUSG00000079184	75339	HFDdf_WT	HFDdf_both	0.973	-0.072	-1.045	-3.89	0.000381	0.0108	Mphosph8	M-phase phosphoprotein 8	protein_coding;
124	4.703	5.165	5.137	5.409	5.345	5.226	ENSMUSG00000054499	67379	HFDdf_WT	HFDdf_both	0.706	0.18	-0.525	-3.89	0.000384	0.0109	Dedd2	death effector domain-containing DNA binding protein 2	protein_coding;
125	5.977	6.4	6.333	7.062	6.72	6.47	ENSMUSG00000079197	19188	HFDdf_WT	HFDdf_both	1.085	0.32	-0.765	-3.88	0.000397	0.0111	Psme2	proteasome (prosome, macropain) activator subunit 2 (PA28 beta)	protein_coding;
126	6.317	6.688	6.803	7.113	6.813	6.65	ENSMUSG00000055762	66656	HFDdf_WT	HFDdf_both	0.796	0.124	-0.672	-3.87	0.000411	0.0114	Eef1d	eukaryotic translation elongation factor 1 delta (guanine nucleotide exchange protein)	protein_coding;
127	6.899	7.264	7.32	7.711	7.419	7.369	ENSMUSG00000025362	27370	HFDdf_WT	HFDdf_both	0.812	0.156	-0.656	-3.85	0.000429	0.0117	Rps26	ribosomal protein S26	protein_coding;
128	4.739	5.193	5.329	5.752	5.29	5.087	ENSMUSG00000010406	68836	HFDdf_WT	HFDdf_both	1.013	0.096	-0.917	-3.84	0.000442	0.0119	Mrpl52	mitochondrial ribosomal protein L52	protein_coding;
129	6.301	6.866	6.76	7.704	7.372	7.104	ENSMUSG00000067288	54127	HFDdf_WT	HFDdf_both	1.402	0.506	-0.897	-3.84	0.000448	0.012	Rps28	ribosomal protein S28	protein_coding;
130	-2.155	-0.873	-1.431	6.691	6.769	5.773	ENSMUSG00000035186	24108	HFDdf_WT	HFDdf_both	8.846	7.204	-1.642	-3.84	0.000445	0.0236	Ubd	ubiquitin D	protein_coding;
131	4.682	5.117	5.143	5.452	4.932	4.714	ENSMUSG00000022635	67197	HFDdf_WT	HFDdf_both	0.769	-0.185	-0.954	-3.83	0.000451	0.012	Zcrb1	zinc finger CCHC-type and RNA binding motif 1	protein_coding;
132	6.554	6.828	6.827	6.802	6.697	6.518	ENSMUSG00000029649	66537	HFDdf_WT	HFDdf_both	0.248	-0.308	-0.556	-3.82	0.000474	0.0243	Pomp	proteasome maturation protein	protein_coding;
133	6.43	6.94	6.973	7.917	7.504	7.394	ENSMUSG00000034892	20090	HFDdf_WT	HFDdf_both	1.487	0.564	-0.923	-3.81	0.000487	0.0126	Rps29	ribosomal protein S29	protein_coding;
134	4.043	4.406	4.351	4.449	4.051	3.814	ENSMUSG00000020224	66225	HFDdf_WT	HFDdf_both	0.406	-0.356	-0.762	-3.8	0.000503	0.0129	Llph	LLP homolog, long-term synaptic facilitation (Aplysia)	protein_coding;
135	3.211	3.665	3.61	3.816	3.42	3.127	ENSMUSG00000066637	75516	HFDdf_WT	HFDdf_both	0.606	-0.246	-0.851	-3.8	0.000503	0.0129	Ttc32	tetratricopeptide repeat domain 32	protein_coding;
136	8.933	9.341	9.511	9.283	9.161	9.079	ENSMUSG00000022871	59083	HFDdf_WT	HFDdf_both	0.35	-0.432	-0.782	-3.8	0.000495	0.0247	Fetub	fetuin beta	protein_coding;
137	3.94	4.516	4.401	4.562	4.341	4.022	ENSMUSG00000117924	66836	HFDdf_WT	HFDdf_both	0.622	-0.176	-0.797	-3.78	0.000528	0.0133	Tmem223	transmembrane protein 223	protein_coding;
138	4.626	5.167	5.128	5.546	5.063	4.779	ENSMUSG00000054312	66292	HFDdf_WT	HFDdf_both	0.92	-0.104	-1.024	-3.77	0.000547	0.0136	Mrps21	mitochondrial ribosomal protein S21	protein_coding;
139	2.782	3.591	3.795	5.574	5.221	5.116	ENSMUSG00000039997	15950	HFDdf_WT	HFDdf_both	2.791	1.629	-1.162	-3.76	0.000557	0.0138	Ifi203	interferon activated gene 203	protein_coding;
140	3.517	4.037	4.187	5.037	4.909	4.806	ENSMUSG00000034254	55979	HFDdf_WT	HFDdf_both	1.52	0.619	-0.901	-3.75	0.000575	0.0269	Agpat1	1-acylglycerol-3-phosphate O-acyltransferase 1 (lysophosphatidic acid acyltransferase, alpha)	protein_coding;
141	-3.465	-1.602	-1.411	3.493	3.105	2.894	ENSMUSG00000001131	21857	HFDdf_WT	HFDdf_both	6.958	4.706	-2.252	-3.72	0.000624	0.0149	Timp1	tissue inhibitor of metalloproteinase 1	protein_coding;
142	5.459	5.831	5.8	5.857	5.68	5.405	ENSMUSG00000026087	107734	HFDdf_WT	HFDdf_both	0.397	-0.395	-0.793	-3.71	0.000652	0.0286	Mrpl30	mitochondrial ribosomal protein L30	protein_coding;
143	3.322	3.716	3.658	4.05	3.788	3.388	ENSMUSG00000084957	100503572	HFDdf_WT	HFDdf_both	0.727	-0.269	-0.996	-3.7	0.000662	0.0287	Bbip1	BBSome interacting protein 1	protein_coding;
144	6.159	6.689	6.46	6.738	6.649	6.196	ENSMUSG00000020775	60441	HFDdf_WT	HFDdf_both	0.579	-0.04	-0.619	-3.69	0.000689	0.0158	Mrpl38	mitochondrial ribosomal protein L38	protein_coding;
145	5.25	5.742	5.73	5.875	5.497	5.147	ENSMUSG00000006412	18637	HFDdf_WT	HFDdf_both	0.625	-0.245	-0.871	-3.68	0.000704	0.0161	Pfdn2	prefoldin 2	protein_coding;
146	6.965	7.401	7.312	7.832	7.452	7.064	ENSMUSG00000014313	12864	HFDdf_WT	HFDdf_both	0.868	0.05	-0.817	-3.68	0.000718	0.0163	Cox6c	cytochrome c oxidase subunit 6C	protein_coding;
147	4.627	5.802	5.737	5.438	5.875	5.429	ENSMUSG00000023206	16169	HFDdf_WT	HFDdf_both	0.811	-0.308	-1.119	-3.68	0.000711	0.0296	Il15ra	interleukin 15 receptor, alpha chain	protein_coding;
148	6.823	7.278	7.317	8.393	8.227	8.17	ENSMUSG00000030695	11674	HFDdf_WT	HFDdf_both	1.571	0.949	-0.622	-3.67	0.000732	0.0166	Aldoa	aldolase A, fructose-bisphosphate	protein_coding;
149	1.957	2.5	2.629	4.775	4.386	4.283	ENSMUSG00000038811	14710	HFDdf_WT	HFDdf_both	2.818	1.886	-0.932	-3.64	0.000795	0.0176	Gngt2	guanine nucleotide binding protein (G protein), gamma transducing activity polypeptide 2	protein_coding;
150	5.749	6.34	6.321	7.394	6.932	6.617	ENSMUSG00000057322	67671	HFDdf_WT	HFDdf_both	1.645	0.592	-1.053	-3.63	0.000809	0.0178	Rpl38	ribosomal protein L38	protein_coding;
151	4.853	5.48	5.565	5.352	5.28	5.19	ENSMUSG00000033543	235459	HFDdf_WT	HFDdf_both	0.499	-0.2	-0.699	-3.61	0.000869	0.0187	Gtf2a2	general transcription factor II A, 2	protein_coding;
152	6.233	6.66	6.641	6.918	6.639	6.448	ENSMUSG00000059534	66152	HFDdf_WT	HFDdf_both	0.685	-0.022	-0.706	-3.59	0.000919	0.0194	Uqcr10	ubiquinol-cytochrome c reductase, complex III subunit X	protein_coding;
153	7.811	8.22	8.266	8.457	8.422	8.308	ENSMUSG00000035530	20918	HFDdf_WT	HFDdf_both	0.647	0.202	-0.444	-3.57	0.000965	0.02	Eif1	eukaryotic translation initiation factor 1	protein_coding;
154	4.169	4.875	4.714	5.14	4.938	4.474	ENSMUSG00000073616	66915	HFDdf_WT	HFDdf_both	0.972	0.063	-0.909	-3.56	0.00101	0.0206	Cops9	COP9 signalosome subunit 9	protein_coding;
155	4.89	5.601	5.664	7.891	7.533	7.007	ENSMUSG00000057346	223672	HFDdf_WT	HFDdf_both	3.001	1.343	-1.658	-3.56	0.000998	0.0349	Apol9a	apolipoprotein L 9a	protein_coding;
156	3.082	3.841	3.707	3.724	3.736	3.319	ENSMUSG00000038500	75210	HFDdf_WT	HFDdf_both	0.642	-0.104	-0.746	-3.55	0.00103	0.021	Prr3	proline-rich polypeptide 3	protein_coding;
157	5.949	6.466	6.374	6.982	6.605	6.167	ENSMUSG00000014294	17991	HFDdf_WT	HFDdf_both	1.033	0.139	-0.894	-3.54	0.00105	0.0212	Ndufa2	NADH:ubiquinone oxidoreductase subunit A2	protein_coding;
158	5.23	5.693	5.703	6.538	6.076	5.74	ENSMUSG00000042541	20422	HFDdf_WT	HFDdf_both	1.308	0.384	-0.925	-3.53	0.00109	0.0217	Sem1	SEM1, 26S proteasome complex subunit	protein_coding;
159	5.697	6.024	5.935	6.233	5.954	5.643	ENSMUSG00000065990	66077	HFDdf_WT	HFDdf_both	0.536	-0.07	-0.606	-3.51	0.00114	0.0224	Aurkaip1	aurora kinase A interacting protein 1	protein_coding;
160	2.884	3.819	3.833	4.109	4.01	3.713	ENSMUSG00000074578	NA	HFDdf_WT	HFDdf_both	1.226	0.191	-1.035	-3.51	0.00115	0.0224	Zfas1	zinc finger, NFX1-type containing 1, antisense RNA 1	lncRNA;
161	4.426	4.712	4.733	4.764	4.626	4.522	ENSMUSG00000018565	54351	HFDdf_WT	HFDdf_both	0.337	-0.086	-0.424	-3.5	0.00119	0.0229	Elp5	elongator acetyltransferase complex subunit 5	protein_coding;
162	4.517	5.226	5.289	5.903	5.818	5.575	ENSMUSG00000021458	72061	HFDdf_WT	HFDdf_both	1.387	0.592	-0.795	-3.45	0.00136	0.0251	Aopep	aminopeptidase O	protein_coding;
163	2.527	3.437	3.476	5.508	5.296	4.954	ENSMUSG00000090272	100040462	HFDdf_WT	HFDdf_both	2.981	1.859	-1.122	-3.44	0.0014	0.0256	Mndal	myeloid nuclear differentiation antigen like	protein_coding;
164	6.598	7.06	7.07	7.507	7.13	6.886	ENSMUSG00000036751	110323	HFDdf_WT	HFDdf_both	0.908	0.07	-0.838	-3.43	0.00146	0.0262	Cox6b1	cytochrome c oxidase, subunit 6B1	protein_coding;
165	5.353	5.737	5.74	6.08	5.716	5.414	ENSMUSG00000084786	66177	HFDdf_WT	HFDdf_both	0.727	-0.02	-0.747	-3.42	0.00149	0.0266	Ubl5	ubiquitin-like 5	protein_coding;
166	2.903	3.494	3.415	4.117	3.568	2.97	ENSMUSG00000086859	NA	HFDdf_WT	HFDdf_both	1.214	0.074	-1.141	-3.41	0.00153	0.027	Snhg20	small nucleolar RNA host gene 20	lncRNA;
167	5.34	5.677	5.745	6.084	5.92	5.799	ENSMUSG00000053565	73830	HFDdf_WT	HFDdf_both	0.744	0.053	-0.69	-3.41	0.00152	0.0416	Eif3k	eukaryotic translation initiation factor 3, subunit K	protein_coding;
168	2.963	3.44	3.364	4.548	4.146	3.678	ENSMUSG00000051319	NA	HFDdf_WT	HFDdf_both	1.585	0.706	-0.879	-3.33	0.00191	0.0313	Mtln	mitoregulin	protein_coding;
169	4.456	5.023	4.993	5.171	4.857	4.404	ENSMUSG00000113902	102631912	HFDdf_WT	HFDdf_both	0.715	-0.589	-1.304	-3.33	0.00191	0.0466	Ndufb1	NADH:ubiquinone oxidoreductase subunit B1	protein_coding;
170	6.445	6.878	7.001	7.215	6.868	6.677	ENSMUSG00000033307	17319	HFDdf_WT	HFDdf_both	0.769	-0.01	-0.78	-3.32	0.00197	0.032	Mif	macrophage migration inhibitory factor (glycosylation-inhibiting factor)	protein_coding;
171	6.676	7.091	7.076	7.302	7.249	7.055	ENSMUSG00000090862	68052	HFDdf_WT	HFDdf_both	0.627	-0.022	-0.648	-3.32	0.00199	0.0473	Rps13	ribosomal protein S13	protein_coding;
172	3.95	4.321	4.341	4.361	4.204	4.017	ENSMUSG00000039382	54636	HFDdf_WT	HFDdf_both	0.411	-0.117	-0.528	-3.27	0.00224	0.0342	Wdr45	WD repeat domain 45	protein_coding;
173	4.997	5.563	5.579	5.911	5.412	4.967	ENSMUSG00000023089	68202	HFDdf_WT	HFDdf_both	0.914	-0.15	-1.065	-3.19	0.00284	0.0405	Ndufa5	NADH:ubiquinone oxidoreductase subunit A5	protein_coding;
174	5.783	4.958	5.044	4.184	4.479	4.849	ENSMUSG00000035284	320528	HFDdf_WT	HFDdf_both	-1.598	-0.478	1.12	3.21	0.00266	0.0387	Vps13c	vacuolar protein sorting 13C	protein_coding;
175	-0.562	-2.203	-3.095	-2.624	-1.45	-1.575	ENSMUSG00000041945	211798	HFDdf_WT	HFDdf_both	-2.062	0.753	2.815	3.22	0.00256	0.0377	Mfsd9	major facilitator superfamily domain containing 9	protein_coding;
176	5.851	5.43	5.278	5.337	5.635	5.687	ENSMUSG00000017721	78928	HFDdf_WT	HFDdf_both	-0.514	0.205	0.719	3.3	0.00211	0.0331	Pigt	phosphatidylinositol glycan anchor biosynthesis, class T	protein_coding;
177	6.517	6.119	5.844	5.111	5.472	5.482	ENSMUSG00000030671	18576	HFDdf_WT	HFDdf_both	-1.406	-0.647	0.759	3.31	0.00202	0.0325	Pde3b	phosphodiesterase 3B, cGMP-inhibited	protein_coding;
178	8.265	7.909	7.906	7.714	7.899	8.034	ENSMUSG00000019818	53599	HFDdf_WT	HFDdf_both	-0.55	-0.01	0.54	3.31	0.00203	0.0325	Cd164	CD164 antigen	protein_coding;
179	9.838	9.474	9.41	8.872	9.165	9.31	ENSMUSG00000009614	192166	HFDdf_WT	HFDdf_both	-0.966	-0.309	0.656	3.32	0.00197	0.032	Sardh	sarcosine dehydrogenase	protein_coding;
180	5.764	5.537	5.553	5.272	5.434	5.541	ENSMUSG00000029202	71521	HFDdf_WT	HFDdf_both	-0.492	-0.103	0.389	3.34	0.00186	0.0308	Pds5a	PDS5 cohesin associated factor A	protein_coding;
181	7.761	7.376	7.502	6.892	7.091	7.354	ENSMUSG00000020850	192159	HFDdf_WT	HFDdf_both	-0.869	-0.286	0.584	3.34	0.00187	0.0308	Prpf8	pre-mRNA processing factor 8	protein_coding;
182	4.155	3.273	2.841	3.333	3.318	3.172	ENSMUSG00000042363	216551	HFDdf_WT	HFDdf_both	-0.822	0.046	0.867	3.37	0.0017	0.029	Lgalsl	lectin, galactoside binding-like	protein_coding;
183	2.719	1.797	1.821	1.881	2.052	2.323	ENSMUSG00000026566	68481	HFDdf_WT	HFDdf_both	-0.838	0.255	1.093	3.4	0.00159	0.0276	Mpzl1	myelin protein zero-like 1	protein_coding;
184	2.95	2.273	2.424	1.657	1.984	2.387	ENSMUSG00000029676	101185	HFDdf_WT	HFDdf_both	-1.293	-0.289	1.004	3.4	0.00159	0.0276	Pot1a	protection of telomeres 1A	protein_coding;
185	4.335	3.234	3.132	3.491	3.198	3.412	ENSMUSG00000028525	18578	HFDdf_WT	HFDdf_both	-0.843	0.28	1.123	3.41	0.00151	0.0415	Pde4b	phosphodiesterase 4B, cAMP specific	protein_coding;
186	4.359	4.108	4.15	3.794	4.027	4.163	ENSMUSG00000021189	110616	HFDdf_WT	HFDdf_both	-0.565	-0.082	0.484	3.43	0.00144	0.026	Atxn3	ataxin 3	protein_coding;
187	6.68	5.923	5.757	5.125	5.652	5.819	ENSMUSG00000041828	217258	HFDdf_WT	HFDdf_both	-1.555	-0.271	1.284	3.44	0.0014	0.0256	Abca8a	ATP-binding cassette, sub-family A (ABC1), member 8a	protein_coding;
188	4.477	4.046	3.975	3.798	3.893	3.946	ENSMUSG00000037643	18759	HFDdf_WT	HFDdf_both	-0.68	-0.153	0.527	3.45	0.00135	0.025	Prkci	protein kinase C, iota	protein_coding;
189	3.827	3.412	3.362	2.694	3.148	3.272	ENSMUSG00000050312	106338	HFDdf_WT	HFDdf_both	-1.133	-0.264	0.869	3.45	0.00138	0.0254	Nsun3	NOL1/NOP2/Sun domain family member 3	protein_coding;
190	10.339	9.785	9.764	9.515	9.597	9.733	ENSMUSG00000021794	14661	HFDdf_WT	HFDdf_both	-0.824	-0.188	0.636	3.45	0.00139	0.0254	Glud1	glutamate dehydrogenase 1	protein_coding;
191	5.655	5.245	5.138	5.058	5.437	5.528	ENSMUSG00000030788	67150	HFDdf_WT	HFDdf_both	-0.597	0.192	0.789	3.47	0.00128	0.0242	Rnf141	ring finger protein 141	protein_coding;
192	4.711	4.399	4.528	4.386	4.547	4.758	ENSMUSG00000034709	73825	HFDdf_WT	HFDdf_both	-0.325	0.148	0.474	3.48	0.00126	0.0239	Ppp1r21	protein phosphatase 1, regulatory subunit 21	protein_coding;
193	4.542	4.158	4.16	3.793	4.119	4.257	ENSMUSG00000042997	212114	HFDdf_WT	HFDdf_both	-0.749	-0.039	0.71	3.5	0.00118	0.0228	Nhlrc3	NHL repeat containing 3	protein_coding;
194	6.348	5.981	5.874	5.62	5.825	5.915	ENSMUSG00000026618	381314	HFDdf_WT	HFDdf_both	-0.728	-0.156	0.573	3.51	0.00114	0.0223	Iars2	isoleucine-tRNA synthetase 2, mitochondrial	protein_coding;
195	4.119	3.51	3.026	2.847	3.243	3.053	ENSMUSG00000027883	76123	HFDdf_WT	HFDdf_both	-1.272	-0.267	1.005	3.51	0.00116	0.0225	Gpsm2	G-protein signalling modulator 2 (AGS3-like, C. elegans)	protein_coding;
196	-3.151	-3.828	-3.84	-3.805	-3.81	-3.81	ENSMUSG00000036586	77998	HFDdf_WT	HFDdf_both	-0.654	0.03	0.684	3.51	0.00116	0.0371	Grifin	galectin-related inter-fiber protein	protein_coding;
197	5.532	5.141	5.045	4.778	4.92	4.991	ENSMUSG00000028412	100434	HFDdf_WT	HFDdf_both	-0.754	-0.22	0.534	3.54	0.00106	0.0213	Slc44a1	solute carrier family 44, member 1	protein_coding;
198	3.278	2.455	1.675	1.68	1.868	1.603	ENSMUSG00000051000	229488	HFDdf_WT	HFDdf_both	-1.598	-0.072	1.526	3.56	0.000992	0.0348	Fam160a1	family with sequence similarity 160, member A1	protein_coding;
199	10.749	10.324	10.137	10.129	10.251	10.288	ENSMUSG00000026417	18703	HFDdf_WT	HFDdf_both	-0.62	0.151	0.771	3.56	0.000993	0.0348	Pigr	polymeric immunoglobulin receptor	protein_coding;
200	5.649	5.131	5.189	3.892	4.429	4.674	ENSMUSG00000075470	380959	HFDdf_WT	HFDdf_both	-1.757	-0.702	1.055	3.58	0.000932	0.0196	Alg10b	asparagine-linked glycosylation 10B (alpha-1,2-glucosyltransferase)	protein_coding;
201	8.885	8.604	8.609	8.218	8.381	8.46	ENSMUSG00000042102	74129	HFDdf_WT	HFDdf_both	-0.668	-0.223	0.444	3.58	0.000947	0.0198	Dmgdh	dimethylglycine dehydrogenase precursor	protein_coding;
202	4.768	3.616	3.756	2.567	3.08	3.538	ENSMUSG00000072294	16597	HFDdf_WT	HFDdf_both	-2.201	-0.536	1.664	3.6	0.000882	0.0189	Klf12	Kruppel-like factor 12	protein_coding;
203	4.745	4.314	4.209	3.385	3.6	3.742	ENSMUSG00000028402	17475	HFDdf_WT	HFDdf_both	-1.36	-0.466	0.894	3.66	0.000751	0.0308	Mpdz	multiple PDZ domain protein	protein_coding;
204	-2.117	-3.718	-3.599	-3.555	-3.768	-2.682	ENSMUSG00000100774	NA	HFDdf_WT	HFDdf_both	-1.438	-0.05	1.389	3.69	0.00068	0.0157	Gm7329	predicted gene 7329	processed_pseudogene;
205	7.209	6.646	6.679	5.992	6.226	6.591	ENSMUSG00000051375	75599	HFDdf_WT	HFDdf_both	-1.218	-0.089	1.129	3.69	0.000685	0.029	Pcdh1	protocadherin 1	protein_coding;
206	6.468	5.867	6.085	5.037	5.387	5.729	ENSMUSG00000027255	77038	HFDdf_WT	HFDdf_both	-1.431	-0.48	0.951	3.7	0.000662	0.0154	Arfgap2	ADP-ribosylation factor GTPase activating protein 2	protein_coding;
207	6.542	5.929	5.679	5.494	5.575	5.675	ENSMUSG00000002393	13864	HFDdf_WT	HFDdf_both	-1.048	-0.004	1.044	3.7	0.000659	0.0287	Nr2f6	nuclear receptor subfamily 2, group F, member 6	protein_coding;
208	4.456	3.539	3.167	2.811	3.419	3.291	ENSMUSG00000066357	83669	HFDdf_WT	HFDdf_both	-1.645	-0.12	1.525	3.71	0.000649	0.0152	Wdr6	WD repeat domain 6	protein_coding;
209	4.654	4.196	3.915	3.751	4.079	4.108	ENSMUSG00000036461	13709	HFDdf_WT	HFDdf_both	-0.903	0.193	1.097	3.71	0.000655	0.0287	Elf1	E74-like factor 1	protein_coding;
210	-3.137	-3.822	-3.832	-3.81	-3.81	-3.81	ENSMUSG00000085239	NA	HFDdf_WT	HFDdf_both	-0.673	0.022	0.695	3.72	0.000634	0.0283	Gm12150	predicted gene 12150	lncRNA;
211	6.309	5.661	5.404	5.136	5.168	5.017	ENSMUSG00000039616	68591	HFDdf_WT	HFDdf_both	-1.173	-0.492	0.681	3.73	0.000618	0.0148	Mocos	molybdenum cofactor sulfurase	protein_coding;
212	-0.474	-1.708	-1.43	-3.467	-2.4	-1.533	ENSMUSG00000111539	NA	HFDdf_WT	HFDdf_both	-2.993	-0.692	2.302	3.74	0.000592	0.0144	Gm48372	predicted gene, 48372	TEC;
213	5.696	5.256	5.183	4.966	5.286	5.347	ENSMUSG00000049354	71833	HFDdf_WT	HFDdf_both	-0.73	0.029	0.759	3.78	0.000532	0.0134	Dcaf7	DDB1 and CUL4 associated factor 7	protein_coding;
214	7.272	6.765	6.891	6.743	6.744	6.916	ENSMUSG00000001440	16211	HFDdf_WT	HFDdf_both	-0.528	-0.022	0.507	3.79	0.000514	0.0131	Kpnb1	karyopherin (importin) beta 1	protein_coding;
215	5.838	5.379	5.432	5.448	5.634	5.729	ENSMUSG00000038886	140481	HFDdf_WT	HFDdf_both	-0.39	0.255	0.645	3.82	0.00047	0.0123	Man2a2	mannosidase 2, alpha 2	protein_coding;
216	5.76	5.193	5.025	5.027	5.437	5.508	ENSMUSG00000021703	218442	HFDdf_WT	HFDdf_both	-0.733	0.243	0.977	3.85	0.000429	0.0117	Serinc5	serine incorporator 5	protein_coding;
217	6.283	6.033	5.982	5.445	5.775	5.897	ENSMUSG00000036644	76795	HFDdf_WT	HFDdf_both	-0.838	-0.258	0.58	3.85	0.000432	0.0117	Tbc1d9b	TBC1 domain family, member 9B	protein_coding;
218	-2.596	-3.731	-3.753	-3.787	-3.768	-3.597	ENSMUSG00000102999	NA	HFDdf_WT	HFDdf_both	-1.191	0.156	1.347	3.88	0.000388	0.0218	Gm37762	predicted gene, 37762	TEC;
219	9.46	8.78	8.875	8.039	8.069	8.245	ENSMUSG00000024039	12411	HFDdf_WT	HFDdf_both	-1.421	-0.711	0.709	3.91	0.000362	0.0105	Cbs	cystathionine beta-synthase	protein_coding;
220	5.633	5.17	5.219	4.887	5.027	5.35	ENSMUSG00000033382	75964	HFDdf_WT	HFDdf_both	-0.745	0.131	0.876	3.94	0.000329	0.0199	Trappc8	trafficking protein particle complex 8	protein_coding;
221	9.157	8.82	8.711	8.365	8.621	8.738	ENSMUSG00000016942	71753	HFDdf_WT	HFDdf_both	-0.792	0.027	0.819	3.95	0.000316	0.0195	Tmprss6	transmembrane serine protease 6	protein_coding;
222	6.349	5.937	5.847	5.469	5.765	5.783	ENSMUSG00000036333	77480	HFDdf_WT	HFDdf_both	-0.88	-0.172	0.708	3.96	0.000313	0.00956	Kidins220	kinase D-interacting substrate 220	protein_coding;
223	11.719	11.046	10.956	10.439	11.17	11.449	ENSMUSG00000059908	17836	HFDdf_WT	HFDdf_both	-1.28	0.125	1.405	3.99	0.000283	0.00893	Mug1	murinoglobulin 1	protein_coding;
224	5.925	5.332	5.113	3.894	4.766	4.658	ENSMUSG00000025355	58223	HFDdf_WT	HFDdf_both	-2.032	-0.566	1.466	4	0.000278	0.0088	Mmp19	matrix metallopeptidase 19	protein_coding;
225	2.856	1.325	0.679	0.131	0.276	0.489	ENSMUSG00000046997	211949	HFDdf_WT	HFDdf_both	-2.725	-0.19	2.535	4	0.000275	0.0184	Spsb4	splA/ryanodine receptor domain and SOCS box containing 4	protein_coding;
226	2.694	1.3	0.965	0.779	1.263	1.05	ENSMUSG00000045875	11549	HFDdf_WT	HFDdf_both	-1.914	-0.037	1.877	4.01	0.000267	0.00862	Adra1a	adrenergic receptor, alpha 1a	protein_coding;
227	8.356	8.051	7.727	7.342	7.695	7.576	ENSMUSG00000037542	237320	HFDdf_WT	HFDdf_both	-1.014	-0.356	0.658	4.02	0.000256	0.00839	Aldh8a1	aldehyde dehydrogenase 8 family, member A1	protein_coding;
228	7.249	7.005	6.821	6.515	6.816	6.829	ENSMUSG00000057522	20747	HFDdf_WT	HFDdf_both	-0.734	-0.19	0.544	4.02	0.000261	0.00851	Spop	speckle-type POZ protein	protein_coding;
229	3.781	3.411	3.47	3.178	3.455	3.745	ENSMUSG00000031337	17772	HFDdf_WT	HFDdf_both	-0.603	0.275	0.877	4.02	0.000257	0.0177	Mtm1	X-linked myotubular myopathy gene 1	protein_coding;
230	6.665	5.867	5.593	4.307	5.333	5.426	ENSMUSG00000052595	69865	HFDdf_WT	HFDdf_both	-2.359	-0.533	1.825	4.03	0.000249	0.00827	A1cf	APOBEC1 complementation factor	protein_coding;
231	7.41	7.01	6.704	6.662	6.993	7.14	ENSMUSG00000063077	16561	HFDdf_WT	HFDdf_both	-0.748	0.436	1.185	4.04	0.000247	0.0172	Kif1b	kinesin family member 1B	protein_coding;
232	7.816	7.398	7.308	7.346	7.416	7.44	ENSMUSG00000026626	226849	HFDdf_WT	HFDdf_both	-0.47	0.017	0.487	4.05	0.000235	0.008	Ppp2r5a	protein phosphatase 2, regulatory subunit B', alpha	protein_coding;
233	6.111	4.614	4.132	4.98	4.845	4.615	ENSMUSG00000022512	12737	HFDdf_WT	HFDdf_both	-1.131	0.231	1.362	4.05	0.000236	0.00803	Cldn1	claudin 1	protein_coding;
234	0.597	-0.576	-1.021	-1.012	0.105	0.131	ENSMUSG00000061013	210719	HFDdf_WT	HFDdf_both	-1.61	0.681	2.291	4.05	0.000237	0.00803	Mkx	mohawk homeobox	protein_coding;
235	7.411	6.948	6.837	6.478	6.79	6.778	ENSMUSG00000040548	21763	HFDdf_WT	HFDdf_both	-0.932	-0.158	0.775	4.05	0.00024	0.0081	Tex2	testis expressed gene 2	protein_coding;
236	5.715	5.021	4.796	4.258	4.508	4.739	ENSMUSG00000000441	110157	HFDdf_WT	HFDdf_both	-1.457	-0.057	1.4	4.06	0.000231	0.0165	Raf1	v-raf-leukemia viral oncogene 1	protein_coding;
237	5.806	5.479	5.49	4.959	5.211	5.476	ENSMUSG00000004319	12725	HFDdf_WT	HFDdf_both	-0.847	-0.015	0.832	4.06	0.000232	0.0165	Clcn3	chloride channel, voltage-sensitive 3	protein_coding;
238	-1.745	-3.481	-3.512	-3.555	-3.296	-3.81	ENSMUSG00000118076	NA	HFDdf_WT	HFDdf_both	-1.81	0.185	1.995	4.07	0.00022	0.00763	Gm50337	predicted gene, 50337	lncRNA;
239	4.024	3.444	3.467	2.799	3.1	3.376	ENSMUSG00000026792	227738	HFDdf_WT	HFDdf_both	-1.226	-0.343	0.883	4.07	0.000222	0.00767	Lrsam1	leucine rich repeat and sterile alpha motif containing 1	protein_coding;
240	5.512	4.869	4.758	4.341	4.451	4.655	ENSMUSG00000040536	69352	HFDdf_WT	HFDdf_both	-1.171	-0.102	1.069	4.07	0.000221	0.0163	Necab1	N-terminal EF-hand calcium binding protein 1	protein_coding;
241	6.568	5.707	5.782	5.823	5.932	6.022	ENSMUSG00000024913	16973	HFDdf_WT	HFDdf_both	-0.745	0.225	0.97	4.1	0.000204	0.00725	Lrp5	low density lipoprotein receptor-related protein 5	protein_coding;
242	6.8	6.43	6.357	6.282	6.486	6.558	ENSMUSG00000002957	11772	HFDdf_WT	HFDdf_both	-0.518	0.056	0.574	4.11	0.0002	0.00718	Ap2a2	adaptor-related protein complex 2, alpha 2 subunit	protein_coding;
243	3.527	2.65	2.241	2.737	2.772	2.95	ENSMUSG00000057315	231532	HFDdf_WT	HFDdf_both	-0.79	0.709	1.499	4.11	0.000197	0.0153	Arhgap24	Rho GTPase activating protein 24	protein_coding;
244	8.043	7.679	7.693	7.319	7.594	7.967	ENSMUSG00000032216	17999	HFDdf_WT	HFDdf_both	-0.724	0.273	0.997	4.12	0.00019	0.0151	Nedd4	neural precursor cell expressed, developmentally down-regulated 4	protein_coding;
245	9.301	8.682	8.741	7.403	7.684	7.761	ENSMUSG00000021069	110095	HFDdf_WT	HFDdf_both	-1.898	-0.998	0.9	4.15	0.000175	0.00652	Pygl	liver glycogen phosphorylase	protein_coding;
246	2.588	1.277	1.393	0.688	0.575	1.301	ENSMUSG00000020642	108089	HFDdf_WT	HFDdf_both	-1.901	-0.091	1.81	4.16	0.000168	0.0143	Rnf144a	ring finger protein 144A	protein_coding;
247	7.136	6.731	6.71	5.938	6.273	6.269	ENSMUSG00000032485	235623	HFDdf_WT	HFDdf_both	-1.198	-0.458	0.74	4.17	0.000168	0.00638	Scap	SREBF chaperone	protein_coding;
248	-2.487	-3.602	-3.726	-3.749	-2.614	-3.68	ENSMUSG00000104181	NA	HFDdf_WT	HFDdf_both	-1.261	0.988	2.25	4.2	0.000151	0.00595	Gm8850	predicted gene 8850	processed_pseudogene;
249	0.503	-1.378	-2.198	-1.493	0.423	-0.177	ENSMUSG00000020435	74309	HFDdf_WT	HFDdf_both	-1.996	1.802	3.798	4.2	0.000153	0.00597	Osbp2	oxysterol binding protein 2	protein_coding;
250	3.364	2.8	2.809	1.497	2.442	2.538	ENSMUSG00000026384	19258	HFDdf_WT	HFDdf_both	-1.867	-0.358	1.509	4.21	0.000145	0.0058	Ptpn4	protein tyrosine phosphatase, non-receptor type 4	protein_coding;
251	6.736	5.773	5.733	5.092	5.368	5.411	ENSMUSG00000039145	227541	HFDdf_WT	HFDdf_both	-1.645	-0.405	1.24	4.21	0.000147	0.00583	Camk1d	calcium/calmodulin-dependent protein kinase ID	protein_coding;
252	5.399	4.927	4.883	4.68	5.133	5.14	ENSMUSG00000015305	70097	HFDdf_WT	HFDdf_both	-0.719	0.206	0.925	4.22	0.00014	0.00567	Sash1	SAM and SH3 domain containing 1	protein_coding;
253	6.177	5.863	5.847	5.549	5.91	5.983	ENSMUSG00000074582	99371	HFDdf_WT	HFDdf_both	-0.628	0.047	0.675	4.22	0.000141	0.00567	Arfgef2	ADP-ribosylation factor guanine nucleotide-exchange factor 2 (brefeldin A-inhibited)	protein_coding;
254	7.734	7.074	6.895	6.387	6.851	6.909	ENSMUSG00000054008	15531	HFDdf_WT	HFDdf_both	-1.347	-0.223	1.124	4.22	0.000144	0.00575	Ndst1	N-deacetylase/N-sulfotransferase (heparan glucosaminyl) 1	protein_coding;
255	5.323	4.742	4.515	4.273	4.942	4.845	ENSMUSG00000046079	231549	HFDdf_WT	HFDdf_both	-1.05	0.2	1.25	4.24	0.000134	0.00547	Lrrc8d	leucine rich repeat containing 8D	protein_coding;
256	4.817	4.415	4.163	3.642	3.868	3.915	ENSMUSG00000032058	73699	HFDdf_WT	HFDdf_both	-1.175	-0.248	0.927	4.26	0.000128	0.0122	Ppp2r1b	protein phosphatase 2, regulatory subunit A, beta	protein_coding;
257	5	4.573	4.729	4.415	4.513	4.659	ENSMUSG00000041852	21411	HFDdf_WT	HFDdf_both	-0.585	-0.06	0.525	4.29	0.000114	0.00498	Tcf20	transcription factor 20	protein_coding;
258	8.59	7.932	7.803	6.687	7.532	7.483	ENSMUSG00000057880	268860	HFDdf_WT	HFDdf_both	-1.903	-0.4	1.503	4.32	0.000105	0.00468	Abat	4-aminobutyrate aminotransferase	protein_coding;
259	6.083	5.528	5.525	5.365	5.571	5.548	ENSMUSG00000020919	20851	HFDdf_WT	HFDdf_both	-0.718	0.042	0.761	4.32	0.000106	0.00473	Stat5b	signal transducer and activator of transcription 5B	protein_coding;
260	6.57	5.755	5.338	5.838	5.708	5.444	ENSMUSG00000032012	58235	HFDdf_WT	HFDdf_both	-0.731	-0.047	0.685	4.34	9.97e-05	0.00452	Nectin1	nectin cell adhesion molecule 1	protein_coding;
261	6.827	6.487	6.495	5.735	6.12	6.184	ENSMUSG00000044308	68795	HFDdf_WT	HFDdf_both	-1.092	-0.367	0.724	4.36	9.2e-05	0.0043	Ubr3	ubiquitin protein ligase E3 component n-recognin 3	protein_coding;
262	5.294	4.801	4.637	4.715	5.179	5.13	ENSMUSG00000006567	11979	HFDdf_WT	HFDdf_both	-0.579	0.378	0.957	4.37	9.13e-05	0.00428	Atp7b	ATPase, Cu++ transporting, beta polypeptide	protein_coding;
263	7.357	6.839	6.777	6.443	6.917	6.852	ENSMUSG00000039114	68404	HFDdf_WT	HFDdf_both	-0.913	0.077	0.99	4.38	8.63e-05	0.00412	Nrn1	neuritin 1	protein_coding;
264	6.378	5.759	5.741	5.582	5.685	6.078	ENSMUSG00000021279	217866	HFDdf_WT	HFDdf_both	-0.796	0.338	1.134	4.39	8.55e-05	0.00981	Cdc42bpb	CDC42 binding protein kinase beta	protein_coding;
265	5.102	3.891	4.323	2.669	3.65	4.509	ENSMUSG00000021823	22330	HFDdf_WT	HFDdf_both	-2.434	-0.241	2.193	4.4	8.33e-05	0.00403	Vcl	vinculin	protein_coding;
266	4.935	4.555	4.624	4.143	4.746	4.791	ENSMUSG00000056493	17425	HFDdf_WT	HFDdf_both	-0.792	0.19	0.983	4.43	7.57e-05	0.00378	Foxk1	forkhead box K1	protein_coding;
267	4.582	3.702	3.786	3.677	4.091	4.192	ENSMUSG00000038181	100910	HFDdf_WT	HFDdf_both	-0.905	0.388	1.294	4.46	6.9e-05	0.00352	Chpf2	chondroitin polymerizing factor 2	protein_coding;
268	5.69	4.922	5.059	4.642	4.872	5.018	ENSMUSG00000075595	268469	HFDdf_WT	HFDdf_both	-1.048	-0.05	0.998	4.49	6.16e-05	0.00325	Zfp652	zinc finger protein 652	protein_coding;
269	3.259	2.812	2.402	2.706	3.028	3.016	ENSMUSG00000040022	74998	HFDdf_WT	HFDdf_both	-0.553	0.614	1.167	4.5	6e-05	0.00795	Rab11fip2	RAB11 family interacting protein 2 (class I)	protein_coding;
270	8.564	8.027	7.87	7.564	7.894	7.713	ENSMUSG00000047866	66887	HFDdf_WT	HFDdf_both	-1	-0.133	0.867	4.51	5.87e-05	0.00315	Lonp2	lon peptidase 2, peroxisomal	protein_coding;
271	5.922	5.469	5.506	4.946	5.054	5.249	ENSMUSG00000032309	71999	HFDdf_WT	HFDdf_both	-0.976	-0.415	0.56	4.53	5.49e-05	0.00301	Fbxo22	F-box protein 22	protein_coding;
272	7.327	7.06	7.065	6.675	7.1	7.144	ENSMUSG00000063015	12453	HFDdf_WT	HFDdf_both	-0.652	0.04	0.692	4.55	5.1e-05	0.00287	Ccni	cyclin I	protein_coding;
273	6.913	6.664	6.633	6.638	6.959	6.907	ENSMUSG00000000346	23994	HFDdf_WT	HFDdf_both	-0.275	0.295	0.57	4.55	5.18e-05	0.00289	Dazap2	DAZ associated protein 2	protein_coding;
274	7.799	7.132	7.093	6.776	7.022	7.378	ENSMUSG00000027184	53872	HFDdf_WT	HFDdf_both	-1.023	0.285	1.308	4.55	5.22e-05	0.00705	Caprin1	cell cycle associated protein 1	protein_coding;
275	8.469	8.134	8.007	7.347	7.854	7.813	ENSMUSG00000079057	102294	HFDdf_WT	HFDdf_both	-1.123	-0.28	0.842	4.56	4.94e-05	0.00281	Cyp4v3	cytochrome P450, family 4, subfamily v, polypeptide 3	protein_coding;
276	5.078	4.512	4.552	3.748	4.154	4.8	ENSMUSG00000041977	213498	HFDdf_WT	HFDdf_both	-1.33	0.248	1.578	4.56	5.07e-05	0.00692	Arhgef11	Rho guanine nucleotide exchange factor (GEF) 11	protein_coding;
277	4.51	4.014	3.856	3.95	4.158	3.964	ENSMUSG00000057963	217837	HFDdf_WT	HFDdf_both	-0.56	0.143	0.704	4.57	4.85e-05	0.00277	Itpk1	inositol 1,3,4-triphosphate 5/6 kinase	protein_coding;
278	8.291	7.882	7.688	7.339	7.675	7.879	ENSMUSG00000020821	16562	HFDdf_WT	HFDdf_both	-0.952	0.191	1.143	4.57	4.82e-05	0.00674	Kif1c	kinesin family member 1C	protein_coding;
279	5.368	5.061	4.879	4.583	4.933	5.102	ENSMUSG00000042688	50772	HFDdf_WT	HFDdf_both	-0.785	0.223	1.008	4.57	4.86e-05	0.00678	Mapk6	mitogen-activated protein kinase 6	protein_coding;
280	-1.446	-3.773	-3.757	-3.581	-3.81	-1.805	ENSMUSG00000021991	12294	HFDdf_WT	HFDdf_both	-2.135	-0.037	2.098	4.61	4.36e-05	0.00256	Cacna2d3	calcium channel, voltage-dependent, alpha2/delta subunit 3	protein_coding;
281	5.956	5.088	5.206	4.87	4.954	5.121	ENSMUSG00000037270	229227	HFDdf_WT	HFDdf_both	-1.086	-0.134	0.953	4.64	3.94e-05	0.00236	4932438A13Rik	RIKEN cDNA 4932438A13 gene	protein_coding;
282	8.121	7.31	7.05	6.91	7.247	7.162	ENSMUSG00000024978	14732	HFDdf_WT	HFDdf_both	-1.211	-0.063	1.148	4.65	3.75e-05	0.00228	Gpam	glycerol-3-phosphate acyltransferase, mitochondrial	protein_coding;
283	5.783	5.25	5.169	4.343	5.028	5.01	ENSMUSG00000028630	69181	HFDdf_WT	HFDdf_both	-1.44	-0.222	1.217	4.69	3.39e-05	0.00211	Dyrk2	dual-specificity tyrosine-(Y)-phosphorylation regulated kinase 2	protein_coding;
284	1.836	-0.163	-0.535	-0.524	0.113	0.794	ENSMUSG00000017491	218772	HFDdf_WT	HFDdf_both	-2.36	1.329	3.689	4.69	3.33e-05	0.00528	Rarb	retinoic acid receptor, beta	protein_coding;
285	7.603	7.095	7.011	7.194	7.475	7.624	ENSMUSG00000015970	218865	HFDdf_WT	HFDdf_both	-0.409	0.38	0.789	4.71	3.15e-05	0.002	Chdh	choline dehydrogenase	protein_coding;
286	5.452	4.946	4.751	4.399	4.816	5.132	ENSMUSG00000041997	228012	HFDdf_WT	HFDdf_both	-1.053	0.381	1.434	4.73	2.93e-05	0.00503	Tlk1	tousled-like kinase 1	protein_coding;
287	4.198	3.798	3.765	3.838	4.169	4.364	ENSMUSG00000034187	18195	HFDdf_WT	HFDdf_both	-0.36	0.371	0.731	4.74	2.83e-05	0.00185	Nsf	N-ethylmaleimide sensitive fusion protein	protein_coding;
288	-2.264	-3.482	-3.67	-3.81	-3.768	-3.81	ENSMUSG00000116604	NA	HFDdf_WT	HFDdf_both	-1.546	-0.14	1.406	4.75	2.75e-05	0.00499	Gm49745	predicted gene, 49745	lncRNA;
289	5.561	4.343	4.2	3.576	3.835	3.582	ENSMUSG00000039395	381269	HFDdf_WT	HFDdf_both	-1.984	-0.507	1.477	4.76	2.72e-05	0.00179	Mreg	melanoregulin	protein_coding;
290	7.67	7.484	7.386	7.272	7.534	7.453	ENSMUSG00000004789	78920	HFDdf_WT	HFDdf_both	-0.398	0.051	0.449	4.77	2.58e-05	0.00173	Dlst	dihydrolipoamide S-succinyltransferase (E2 component of 2-oxo-glutarate complex)	protein_coding;
291	5.252	4.849	4.826	4.901	5.033	4.978	ENSMUSG00000027198	14043	HFDdf_WT	HFDdf_both	-0.35	0.184	0.535	4.79	2.42e-05	0.00167	Ext2	exostoses (multiple) 2	protein_coding;
292	6.612	6.039	5.863	5.628	5.896	6.035	ENSMUSG00000035248	214290	HFDdf_WT	HFDdf_both	-0.984	0.172	1.156	4.79	2.48e-05	0.00468	Tut7	terminal uridylyl transferase 7	protein_coding;
293	-2.653	-3.771	-3.754	-3.81	-3.296	-3.81	ENSMUSG00000081758	NA	HFDdf_WT	HFDdf_both	-1.157	0.476	1.633	4.82	2.22e-05	0.00155	Gm11460	predicted gene 11460	processed_pseudogene;
294	4.988	4.055	4.253	3.733	4.343	4.459	ENSMUSG00000040524	214812	HFDdf_WT	HFDdf_both	-1.254	0.288	1.542	4.84	2.13e-05	0.0015	Zfp609	zinc finger protein 609	protein_coding;
295	5.043	4.452	4.227	4.077	4.381	4.534	ENSMUSG00000070044	212326	HFDdf_WT	HFDdf_both	-0.965	0.307	1.272	4.84	2.12e-05	0.00417	Fam149a	family with sequence similarity 149, member A	protein_coding;
296	5.557	5.042	4.608	4.521	5.051	5.22	ENSMUSG00000052085	76088	HFDdf_WT	HFDdf_both	-1.036	0.612	1.649	4.87	1.94e-05	0.00394	Dock8	dedicator of cytokinesis 8	protein_coding;
297	4.195	3.945	3.888	3.788	4.207	4.062	ENSMUSG00000046020	140484	HFDdf_WT	HFDdf_both	-0.407	0.262	0.669	4.88	1.84e-05	0.00136	Pofut1	protein O-fucosyltransferase 1	protein_coding;
298	3.344	0.368	0.554	-3.81	-3.81	-3.57	ENSMUSG00000025229	18742	HFDdf_WT	HFDdf_both	-7.154	-4.125	3.029	4.89	1.8e-05	0.00375	Pitx3	paired-like homeodomain transcription factor 3	protein_coding;
299	6.139	5.58	5.448	4.875	5.261	5.146	ENSMUSG00000000168	235339	HFDdf_WT	HFDdf_both	-1.264	-0.319	0.945	4.93	1.6e-05	0.00123	Dlat	dihydrolipoamide S-acetyltransferase (E2 component of pyruvate dehydrogenase complex)	protein_coding;
300	10.113	9.619	9.696	9.714	10.034	10.099	ENSMUSG00000001435	12822	HFDdf_WT	HFDdf_both	-0.399	0.415	0.814	4.96	1.44e-05	0.00114	Col18a1	collagen, type XVIII, alpha 1	protein_coding;
301	5.845	5.607	5.567	5.369	5.521	5.746	ENSMUSG00000022770	13383	HFDdf_WT	HFDdf_both	-0.477	0.179	0.655	4.98	1.36e-05	0.00304	Dlg1	discs large MAGUK scaffold protein 1	protein_coding;
302	3.593	2.885	2.742	2.611	2.986	2.696	ENSMUSG00000026565	18986	HFDdf_WT	HFDdf_both	-0.982	0.101	1.083	5	1.25e-05	0.00101	Pou2f1	POU domain, class 2, transcription factor 1	protein_coding;
303	4.899	4.635	4.558	4.067	4.342	4.197	ENSMUSG00000030965	109359	HFDdf_WT	HFDdf_both	-0.833	-0.293	0.539	5	1.28e-05	0.00104	Abraxas2	BRISC complex subunit	protein_coding;
304	10.074	9.044	9.089	9.257	9.589	9.791	ENSMUSG00000030131	17837	HFDdf_WT	HFDdf_both	-0.816	0.545	1.362	5.01	1.24e-05	0.001	Mug2	murinoglobulin 2	protein_coding;
305	7.924	6.513	6.553	5.958	6.21	6.066	ENSMUSG00000015357	270166	HFDdf_WT	HFDdf_both	-1.966	-0.303	1.663	5.05	1.08e-05	0.000892	Clpx	caseinolytic mitochondrial matrix peptidase chaperone subunit	protein_coding;
306	6.811	4.574	4.179	3.252	3.919	3.858	ENSMUSG00000033107	67664	HFDdf_WT	HFDdf_both	-3.559	-0.655	2.904	5.06	1.07e-05	0.000882	Rnf125	ring finger protein 125	protein_coding;
307	4.895	4.191	3.8	4.435	4.756	4.382	ENSMUSG00000026389	68428	HFDdf_WT	HFDdf_both	-0.46	0.565	1.025	5.12	8.73e-06	0.000751	Steap3	STEAP family member 3	protein_coding;
308	7.237	6.749	6.767	6.013	6.346	6.417	ENSMUSG00000061130	19043	HFDdf_WT	HFDdf_both	-1.224	-0.403	0.821	5.15	7.79e-06	0.000686	Ppm1b	protein phosphatase 1B, magnesium dependent, beta isoform	protein_coding;
309	4.844	4.512	4.518	4.176	4.489	4.501	ENSMUSG00000024943	226026	HFDdf_WT	HFDdf_both	-0.668	-0.023	0.644	5.15	7.94e-06	0.000695	Smc5	structural maintenance of chromosomes 5	protein_coding;
310	7.666	7.11	6.492	6.867	7.135	7.353	ENSMUSG00000046959	231583	HFDdf_WT	HFDdf_both	-0.799	0.862	1.66	5.2	6.68e-06	0.00183	Slc26a1	solute carrier family 26 (sulfate transporter), member 1	protein_coding;
311	4.732	4.334	4.309	3.773	4.367	4.172	ENSMUSG00000069895	52335	HFDdf_WT	HFDdf_both	-0.959	0.032	0.991	5.25	5.83e-06	0.000532	Atxn1l	ataxin 1-like	protein_coding;
312	6.696	5.75	5.78	5.94	6.208	6.003	ENSMUSG00000021559	69635	HFDdf_WT	HFDdf_both	-0.757	0.458	1.215	5.32	4.68e-06	0.000441	Dapk1	death associated protein kinase 1	protein_coding;
313	8.408	7.817	7.774	7.61	7.896	7.84	ENSMUSG00000020741	74148	HFDdf_WT	HFDdf_both	-0.798	0.079	0.877	5.34	4.31e-06	0.000419	Cluh	clustered mitochondria (cluA/CLU1) homolog	protein_coding;
314	9.73	9.292	9.369	9.072	9.346	9.483	ENSMUSG00000006529	16424	HFDdf_WT	HFDdf_both	-0.658	0.054	0.713	5.37	3.99e-06	0.00039	Itih1	inter-alpha trypsin inhibitor, heavy chain 1	protein_coding;
315	4.536	3.693	3.993	2.502	3.914	3.662	ENSMUSG00000005580	11515	HFDdf_WT	HFDdf_both	-2.034	0.221	2.255	5.39	3.69e-06	0.000368	Adcy9	adenylate cyclase 9	protein_coding;
316	5.45	4.484	3.841	3.112	3.322	3.66	ENSMUSG00000021338	68732	HFDdf_WT	HFDdf_both	-2.338	-0.181	2.157	5.47	2.88e-06	0.000915	Carmil1	capping protein regulator and myosin 1 linker 1	protein_coding;
317	-2.738	-3.74	-3.794	-3.81	-2.207	-3.81	ENSMUSG00000117007	NA	HFDdf_WT	HFDdf_both	-1.072	1.532	2.604	5.57	2.11e-06	0.000224	Gm41556	predicted gene, 41556	lncRNA;
318	4.574	4.186	4.028	3.925	4.378	4.23	ENSMUSG00000051390	81630	HFDdf_WT	HFDdf_both	-0.649	0.192	0.841	5.65	1.63e-06	0.000182	Zbtb22	zinc finger and BTB domain containing 22	protein_coding;
319	7.947	6.401	6.65	5.454	5.902	5.775	ENSMUSG00000024827	104174	HFDdf_WT	HFDdf_both	-2.493	-0.499	1.995	5.74	1.22e-06	0.000148	Gldc	glycine decarboxylase	protein_coding;
320	8.097	7.853	7.883	7.576	7.96	7.891	ENSMUSG00000026687	56752	HFDdf_WT	HFDdf_both	-0.521	0.107	0.628	5.78	1.05e-06	0.000129	Aldh9a1	aldehyde dehydrogenase 9, subfamily A1	protein_coding;
321	5.588	4.667	4.342	4.329	4.69	4.952	ENSMUSG00000053617	14218	HFDdf_WT	HFDdf_both	-1.26	0.61	1.87	5.85	8.53e-07	0.000304	Sh3pxd2a	SH3 and PX domains 2A	protein_coding;
322	5.413	5.025	4.98	4.571	4.86	4.802	ENSMUSG00000021786	71147	HFDdf_WT	HFDdf_both	-0.842	-0.165	0.678	5.97	5.86e-07	0.000101	Oxsm	3-oxoacyl-ACP synthase, mitochondrial	protein_coding;
323	5.588	4.234	4.171	4.613	4.609	4.785	ENSMUSG00000024236	225115	HFDdf_WT	HFDdf_both	-0.975	0.376	1.351	6.11	3.7e-07	0.000101	Svil	supervillin	protein_coding;
324	-1.979	-3.793	-3.684	-3.672	-3.195	-3.81	ENSMUSG00000087648	NA	HFDdf_WT	HFDdf_both	-1.693	0.598	2.29	6.35	1.72e-07	5.56e-05	E130018N17Rik	RIKEN cDNA E130018N17 gene	lncRNA;
325	3.173	2.624	2.917	2.269	2.997	2.986	ENSMUSG00000027508	94212	HFDdf_WT	HFDdf_both	-0.904	0.373	1.277	6.98	2.37e-08	1.13e-05	Pag1	phosphoprotein associated with glycosphingolipid microdomains 1	protein_coding;
326	-0.741	-3.739	-3.669	-3.708	-3.81	-3.81	ENSMUSG00000005232	14378	HFDdf_WT	HFDdf_both	-2.967	-0.071	2.896	8.72	1.12e-10	1.65e-07	G6pc2	glucose-6-phosphatase, catalytic, 2	protein_coding;
