# Supplementary figures and images for: Absence of Either Ripk3 or Mlkl Reduces Incidence of Hepatocellular Carcinoma Independent of Liver Fibrosis
Source: PubMed Central journal article supplement — Mol Cancer Res. 2023 May 19;21(9):933–46. doi: 10.1158/1541-7786.MCR-22-0820 (PMC10472095; doi:10.1158/1541-7786.mcr-22-0820), 2023-05-19

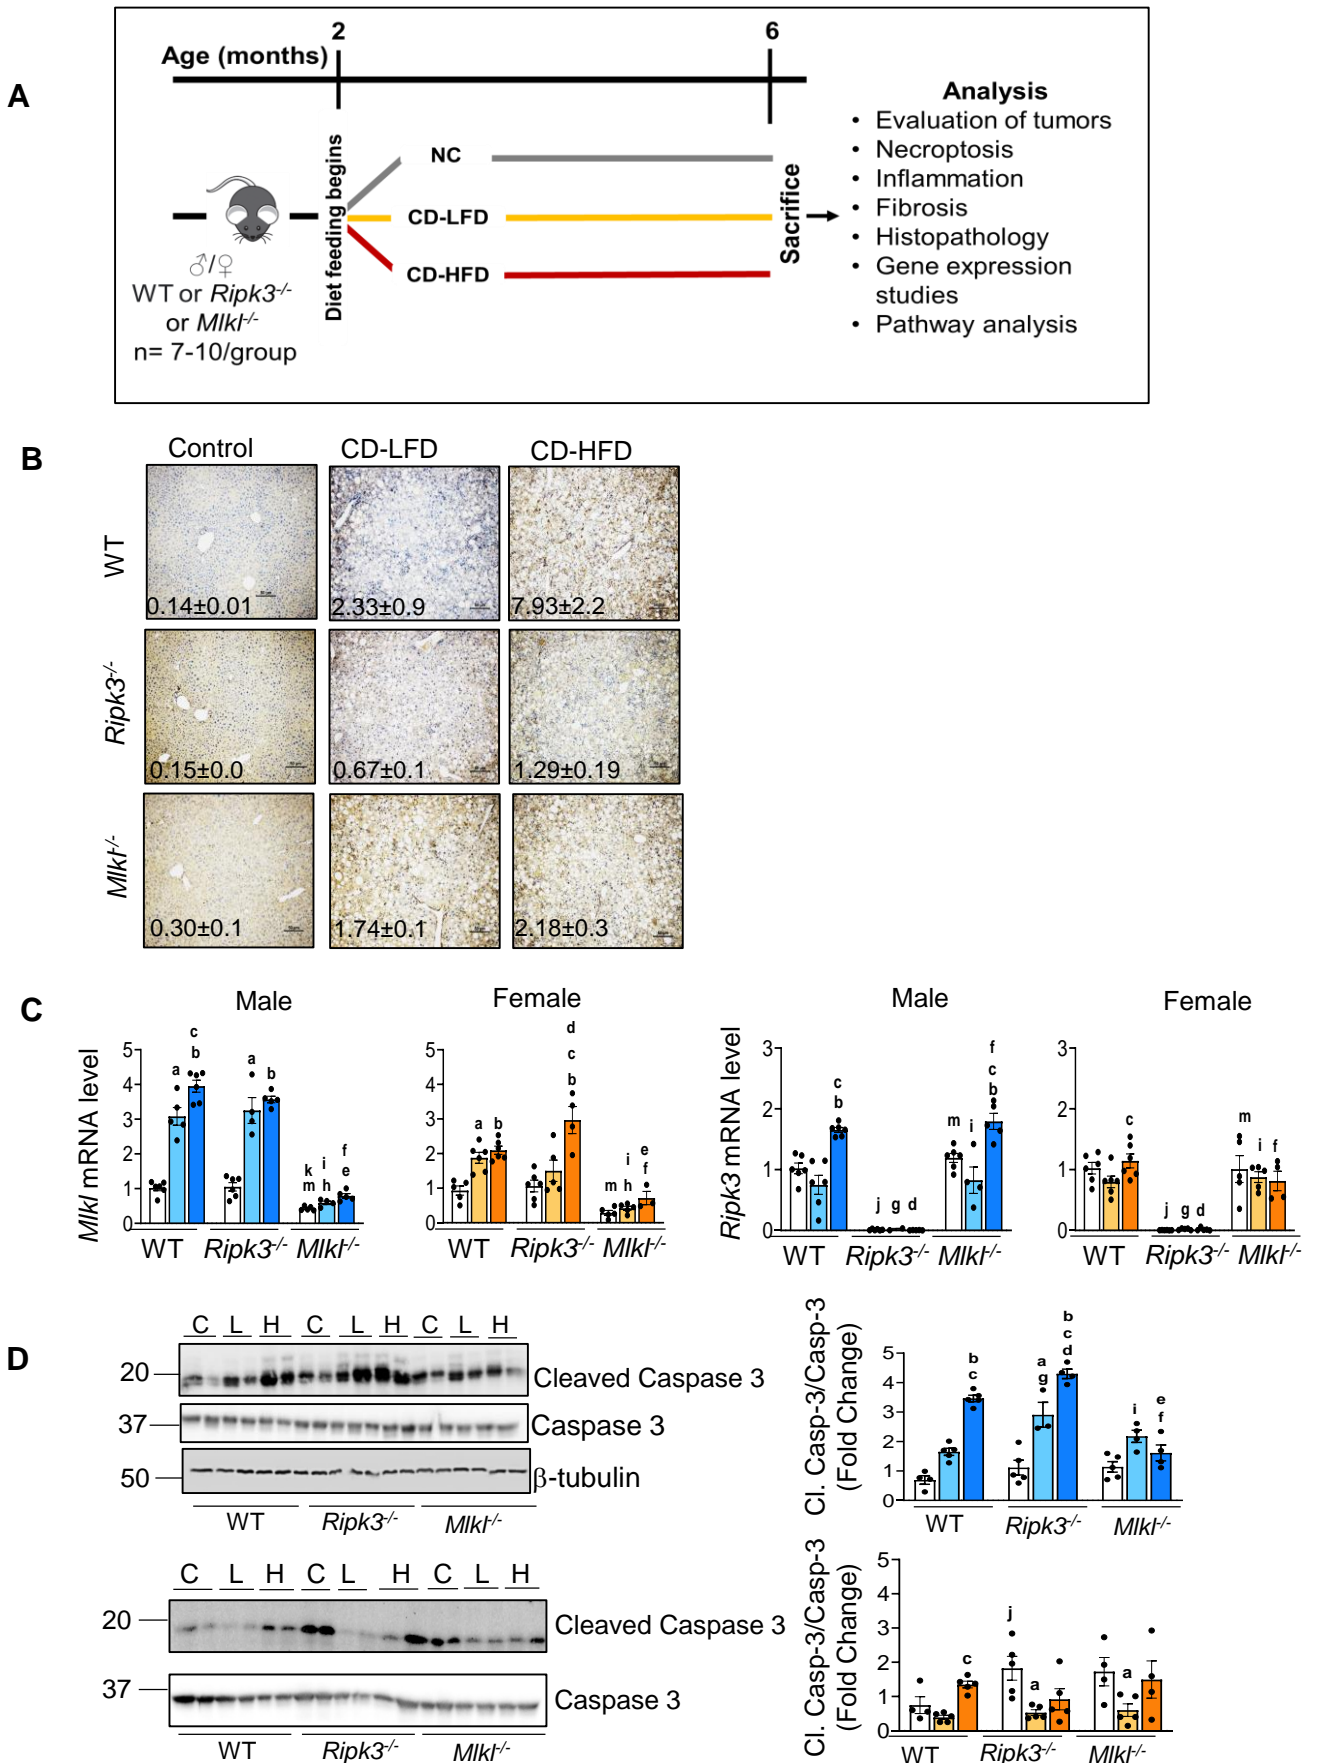

**FIGURE S1**

Supplement: mcr-22-0820_fig.s1_suppsf1.pdf [file mcr-22-0820_fig.s1_suppsf1.pdf]
